# Supplementary material for: An Inflammatory Response-Related Gene Signature Can Predict the Prognosis and Impact the Immune Status of Lung Adenocarcinoma
Source: MDPI journal article supplement (doi:10.3390/cancers14235744), 2022-11-23
Supplement: s1 [file s1]

**Supplementary Material:**

**An inflammatory response-related gene signature can predict the prognosis and impact the immune status of lung adenocarcinoma**

**Supplementary Figures:**

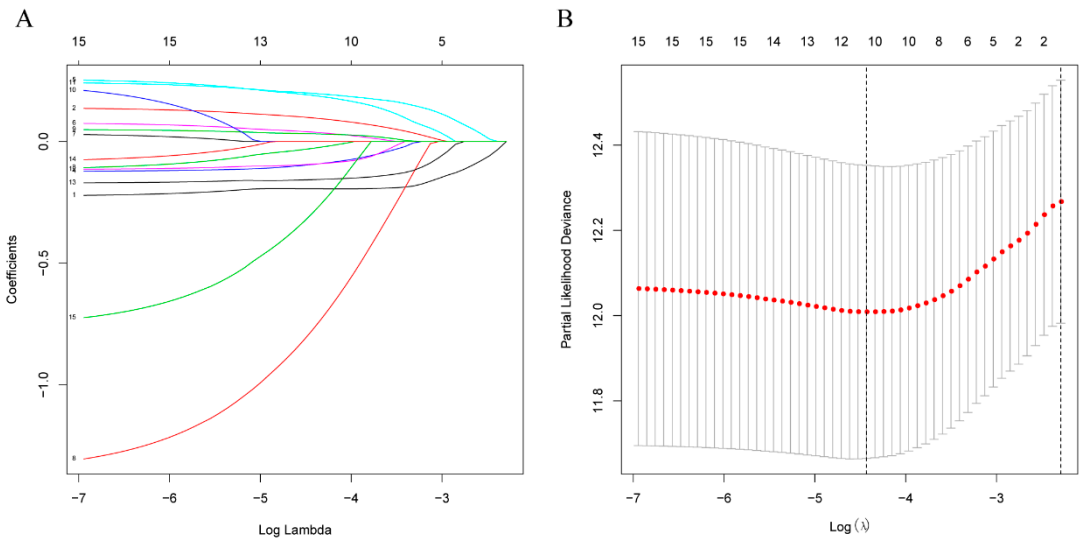

**Supplementary Figure S1.** Constructed an 8-gene signature in the TCGA cohort. (A) LASSO coefficient expression profiles of 15 candidate genes. (B) The penalty parameter ( $\lambda$ ) in the LASSO model was selected through ten cross-validation.

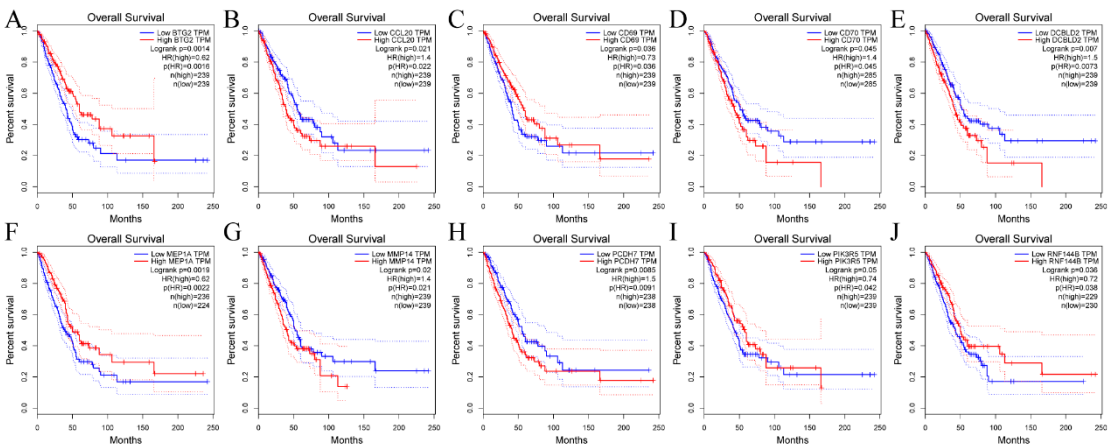

**Supplementary Figure S2.** Survival analysis of prognostic genes according to the optimal cut-off expression value. TCGA cohort(A–H). All adjusted  $P < 0.05$ .

**Supplementary Tables:**

**Table S1** The 200 inflammatory response-related genes

| Gene Symbol | Gene Description                                                          |
|-------------|---------------------------------------------------------------------------|
| ABCA1       | ATP binding cassette subfamily A member 1                                 |
| ABI1        | abl interactor 1                                                          |
| ACVR1B      | activin A receptor type 1B                                                |
| ACVR2A      | activin A receptor type 2A                                                |
| ADM         | adrenomedullin                                                            |
| ADORA2B     | adenosine A2b receptor                                                    |
| ADRM1       | adhesion regulating molecule 1                                            |
| AHR         | aryl hydrocarbon receptor                                                 |
| APLNR       | apelin receptor                                                           |
| AQP9        | aquaporin 9                                                               |
| ATP2A2      | ATPase sarcoplasmic/endoplasmic reticulum Ca <sup>2+</sup> transporting 2 |
| ATP2B1      | ATPase plasma membrane Ca <sup>2+</sup> transporting 1                    |
| ATP2C1      | ATPase secretory pathway Ca <sup>2+</sup> transporting 1                  |
| AXL         | AXL receptor tyrosine kinase                                              |
| BDKRB1      | bradykinin receptor B1                                                    |
| BEST1       | bestrophin 1                                                              |
| BST2        | bone marrow stromal cell antigen 2                                        |
| BTG2        | BTG anti-proliferation factor 2                                           |
| C3AR1       | complement C3a receptor 1                                                 |
| C5AR1       | complement C5a receptor 1                                                 |
| CALCRL      | calcitonin receptor like receptor                                         |
| CCL17       | C-C motif chemokine ligand 17                                             |
| CCL2        | C-C motif chemokine ligand 2                                              |
| CCL20       | C-C motif chemokine ligand 20                                             |
| CCL22       | C-C motif chemokine ligand 22                                             |
| CCL24       | C-C motif chemokine ligand 24                                             |
| CCL5        | C-C motif chemokine ligand 5                                              |
| CCL7        | C-C motif chemokine ligand 7                                              |
| CCR7        | C-C motif chemokine receptor 7                                            |
| CCRL2       | C-C motif chemokine receptor like 2                                       |
| CD14        | CD14 molecule                                                             |
| CD40        | CD40 molecule                                                             |
| CD48        | CD48 molecule                                                             |
| CD55        | CD55 molecule (Cromer blood group)                                        |
| CD69        | CD69 molecule                                                             |
| CD70        | CD70 molecule                                                             |
| CD82        | CD82 molecule                                                             |
| CDKN1A      | cyclin dependent kinase inhibitor 1A                                      |
| CHST2       | carbohydrate sulfotransferase 2                                           |
| CLEC5A      | C-type lectin domain containing 5A                                        |
| CMKLR1      | chemerin chemokine-like receptor 1                                        |
| CSF1        | colony stimulating factor 1                                               |

|         |                                                           |
|---------|-----------------------------------------------------------|
| CSF3    | colony stimulating factor 3                               |
| CSF3R   | colony stimulating factor 3 receptor                      |
| CX3CL1  | C-X3-C motif chemokine ligand 1                           |
| CXCL10  | C-X-C motif chemokine ligand 10                           |
| CXCL11  | C-X-C motif chemokine ligand 11                           |
| CXCL6   | C-X-C motif chemokine ligand 6                            |
| CXCL9   | C-X-C motif chemokine ligand 9                            |
| CXCR6   | C-X-C motif chemokine receptor 6                          |
| CYBB    | cytochrome b-245 beta chain                               |
| DCBLD2  | discoidin, CUB and LCCL domain containing 2               |
| EBI3    | Epstein-Barr virus induced 3                              |
| EDN1    | endothelin 1                                              |
| EIF2AK2 | eukaryotic translation initiation factor 2 alpha kinase 2 |
| EMP3    | epithelial membrane protein 3                             |
| ADGRE1  | adhesion G protein-coupled receptor E1                    |
| EREG    | epiregulin                                                |
| F3      | coagulation factor III, tissue factor                     |
| FFAR2   | free fatty acid receptor 2                                |
| FPR1    | formyl peptide receptor 1                                 |
| FZD5    | frizzled class receptor 5                                 |
| GABBR1  | gamma-aminobutyric acid type B receptor subunit 1         |
| GCH1    | GTP cyclohydrolase 1                                      |
| GNA15   | G protein subunit alpha 15                                |
| GNAI3   | G protein subunit alpha i3                                |
| GP1BA   | glycoprotein Ib platelet subunit alpha                    |
| GPC3    | glypican 3                                                |
| GPR132  | G protein-coupled receptor 132                            |
| GPR183  | G protein-coupled receptor 183                            |
| HAS2    | hyaluronan synthase 2                                     |
| HBEGF   | heparin binding EGF like growth factor                    |
| HIF1A   | hypoxia inducible factor 1 subunit alpha                  |
| HPN     | hepsin                                                    |
| HRH1    | histamine receptor H1                                     |
| ICAM1   | intercellular adhesion molecule 1                         |
| ICAM4   | intercellular adhesion molecule 4                         |
| ICOSLG  | inducible T cell costimulator ligand                      |
| IFITM1  | interferon induced transmembrane protein...               |
| IFNAR1  | interferon alpha and beta receptor subun...               |
| IFNGR2  | interferon gamma receptor 2                               |
| IL10    | interleukin 10                                            |
| IL10RA  | interleukin 10 receptor subunit alpha                     |
| IL12B   | interleukin 12B                                           |
| IL15    | interleukin 15                                            |
| IL15RA  | interleukin 15 receptor subunit alpha                     |

|         |                                                                           |
|---------|---------------------------------------------------------------------------|
| IL18    | interleukin 18                                                            |
| IL18R1  | interleukin 18 receptor 1                                                 |
| IL18RAP | interleukin 18 receptor accessory protein                                 |
| IL1A    | interleukin 1 alpha                                                       |
| IL1B    | interleukin 1 beta                                                        |
| IL1R1   | interleukin 1 receptor type 1                                             |
| IL2RB   | interleukin 2 receptor subunit beta                                       |
| IL4R    | interleukin 4 receptor                                                    |
| IL6     | interleukin 6                                                             |
| IL7R    | interleukin 7 receptor                                                    |
| CXCL8   | C-X-C motif chemokine ligand 8                                            |
| INHBA   | inhibin subunit beta A                                                    |
| IRAK2   | interleukin 1 receptor associated kinase 2                                |
| IRF1    | interferon regulatory factor 1                                            |
| IRF7    | interferon regulatory factor 7                                            |
| ITGA5   | integrin subunit alpha 5                                                  |
| ITGB3   | integrin subunit beta 3                                                   |
| ITGB8   | integrin subunit beta 8                                                   |
| KCNA3   | potassium voltage-gated channel subfamily A member 3                      |
| KCNJ2   | potassium inwardly rectifying channel subfamily J member 2                |
| KCNMB2  | potassium calcium-activated channel subfamily M regulatory beta subunit 2 |
| KIF1B   | kinesin family member 1B                                                  |
| KLF6    | Kruppel like factor 6                                                     |
| LAMP3   | lysosomal associated membrane protein 3                                   |
| LCK     | LCK proto-oncogene, Src family tyrosine kinase                            |
| LCP2    | lymphocyte cytosolic protein 2                                            |
| LDLR    | low density lipoprotein receptor                                          |
| LIF     | LIF interleukin 6 family cytokine                                         |
| LPAR1   | lysophosphatidic acid receptor 1                                          |
| LTA     | lymphotoxin alpha                                                         |
| LY6E    | lymphocyte antigen 6 family member E                                      |
| LYN     | LYN proto-oncogene, Src family tyrosine kinase                            |
| MARCO   | macrophage receptor with collagenous structure                            |
| MEFV    | MEFV innate immunity regulator, pyrin                                     |
| MEP1A   | meprin A subunit alpha                                                    |
| MET     | MET proto-oncogene, receptor tyrosine kinase                              |
| MMP14   | matrix metalloproteinase 14                                               |
| MSR1    | macrophage scavenger receptor 1                                           |
| MXD1    | MAX dimerization protein 1                                                |
| MYC     | MYC proto-oncogene, bHLH transcription factor                             |
| NAMPT   | nicotinamide phosphoribosyltransferase                                    |
| NDP     | norrin cystine knot growth factor NDP                                     |
| NFKB1   | nuclear factor kappa B subunit 1                                          |
| NFKBIA  | NFKB inhibitor alpha                                                      |

|          |                                                           |
|----------|-----------------------------------------------------------|
| NLRP3    | NLR family pyrin domain containing 3                      |
| NMI      | N-myc and STAT interactor                                 |
| NMUR1    | neuromedin U receptor 1                                   |
| NOD2     | nucleotide binding oligomerization domain containing 2    |
| NPFFR2   | neuropeptide FF receptor 2                                |
| OLR1     | oxidized low density lipoprotein receptor 1               |
| OPRK1    | opioid receptor kappa 1                                   |
| OSM      | oncostatin M                                              |
| OSMR     | oncostatin M receptor                                     |
| P2RX4    | purinergic receptor P2X 4                                 |
| P2RX7    | purinergic receptor P2X 7                                 |
| P2RY2    | purinergic receptor P2Y2                                  |
| PCDH7    | protocadherin 7                                           |
| PDE4B    | phosphodiesterase 4B                                      |
| PDPN     | podoplanin                                                |
| PIK3R5   | phosphoinositide-3-kinase regulatory subunit 5            |
| PLAUR    | plasminogen activator, urokinase receptor                 |
| PROK2    | prokineticin 2                                            |
| PSEN1    | presenilin 1                                              |
| PTAFR    | platelet activating factor receptor                       |
| PTGER2   | prostaglandin E receptor 2                                |
| PTGER4   | prostaglandin E receptor 4                                |
| PTGIR    | prostaglandin I2 receptor                                 |
| PTPRE    | protein tyrosine phosphatase receptor type E              |
| PVR      | PVR cell adhesion molecule                                |
| RAF1     | Raf-1 proto-oncogene, serine/threonine kinase             |
| RASGRP1  | RAS guanyl releasing protein 1                            |
| RELA     | RELA proto-oncogene, NF-kB subunit                        |
| RGS1     | regulator of G protein signaling 1                        |
| RGS16    | regulator of G protein signaling 16                       |
| RHOG     | ras homolog family member G                               |
| RIPK2    | receptor interacting serine/threonine kinase 2            |
| RNF144B  | ring finger protein 144B                                  |
| ROS1     | ROS proto-oncogene 1, receptor tyrosine kinase            |
| RTP4     | receptor transporter protein 4                            |
| SCARF1   | scavenger receptor class F member 1                       |
| SCN1B    | sodium voltage-gated channel beta subunit 1               |
| SELE     | selectin E                                                |
| SELL     | selectin L                                                |
| SELENOS  | selenoprotein S                                           |
| SEMA4D   | semaphorin 4D                                             |
| SERPINE1 | serpin family E member 1                                  |
| SGMS2    | sphingomyelin synthase 2                                  |
| SLAMF1   | signaling lymphocytic activation molecule family member 1 |

|          |                                    |
|----------|------------------------------------|
| SLC11A2  | solute carrier family 11 member 2  |
| SLC1A2   | solute carrier family 1 member 2   |
| SLC28A2  | solute carrier family 28 member 2  |
| SLC31A1  | solute carrier family 31 member 1  |
| SLC31A2  | solute carrier family 31 member 2  |
| SLC4A4   | solute carrier family 4 member 4   |
| SLC7A1   | solute carrier family 7 member 1   |
| SLC7A2   | solute carrier family 7 member 2   |
| SPHK1    | sphingosine kinase 1               |
| SRI      | sorcin                             |
| STAB1    | stabilin 1                         |
| TACR1    | tachykinin receptor 1              |
| TACR3    | tachykinin receptor 3              |
| TAPBP    | TAP binding protein                |
| TIMP1    | TIMP metalloproteinase inhibitor 1 |
| TLR1     | toll like receptor 1               |
| TLR2     | toll like receptor 2               |
| TLR3     | toll like receptor 3               |
| TNFAIP6  | TNF alpha induced protein 6        |
| TNFRSF1B | TNF receptor superfamily member 1B |
| TNFRSF9  | TNF receptor superfamily member 9  |
| TNFSF10  | TNF superfamily member 10          |
| TNFSF15  | TNF superfamily member 15          |
| TNFSF9   | TNF superfamily member 9           |
| TPBG     | trophoblast glycoprotein           |
| VIP      | vasoactive intestinal peptide      |

**Table S2** The 263 chemotherapy drugs of FDA approved or on clinical trials

| Drug name              |                           |             |
|------------------------|---------------------------|-------------|
| Curcumin               | Nandrolone phenpropionate | Erlotinib   |
| Chelerythrine          | Testolactone              | Fulvestrant |
| 3-Bromopyruvate (acid) | Mithramycin               | Celecoxib   |
| Cordycepin             | Pipobroman                | Zoledronate |
| Benzimate              | Cyclophosphamide          | Belinostat  |
| Pimozide               | Mitomycin                 | Lapatinib   |
| Elesclomol             | Floxuridine               | Irinotecan  |
| Wortmannin             | Hydroxyurea               | Dasatinib   |
| geldanamycin analog    | Uracil mustard            | Everolimus  |
| Elliptinium Acetate    | Dexamethasone Decadron    | Pazopanib   |
| Tricirbine phosphate   | Dacarbazine               | Imatinib    |
| BEN                    | Dacarbazine               | Lapatinib   |
| Amonafide              | Vinblastine               | Nelfinavir  |
| Batracylin             | Acetalax                  | Nilotinib   |

|                                                   |                   |                   |
|---------------------------------------------------|-------------------|-------------------|
| Buthionine sulphoximine                           | Cytarabine        | Olaparib          |
| Tanespimycin                                      | Vincristine       | Ixabepilone       |
| 8-Chloro-adenosine                                | Megestrol acetate | Raloxifene        |
| Hypothemycin                                      | tfdu              | Abiraterone       |
| Fostamatinib                                      | Procarbazine      | Abiraterone       |
| Pyrazoloacridine                                  | Lomustine         | Sunitinib         |
| Fenretinide                                       | Daunorubicin      | Afatinib          |
| Dolastatin 10                                     | Daunorubicin      | Pazopanib         |
| Staurosporine                                     | Streptozocin      | Olaparib          |
| Pyrazoloacridine                                  | Calusterone       | Depsipeptide      |
| Lapachone                                         | Estramustine      | Pralatrexate      |
| O-6-Benzylguanine                                 | Vinblastine       | Pemetrexed        |
| 7-Hydroxystaurosporine                            | Fluphenazine      | Vismodegib        |
| 7-Hydroxystaurosporine                            | Arsenic trioxide  | Actinomycin D     |
| Perifosine                                        | Azacitidine       | Mitomycin         |
| Alvocidib                                         | Cladribine        | Lenvatinib        |
| Midostaurin                                       | Mithramycin       | Nelarabine        |
| XK-469                                            | Asparaginase      | Crizotinib        |
| Triapine                                          | Ifosfamide        | Daunorubicin      |
| kahalide f                                        | Acetalax          | Digoxin           |
| okadaic acid                                      | Fludarabine       | Ethinyl estradiol |
| PD-98059                                          | Cisplatin         | Fluorouracil      |
| Epothilone B                                      | Isotretinoin      | Nitrogen mustard  |
| Amino flavone                                     | Teniposide        | Melphalan         |
| BN-2629                                           | Doxorubicin       | 6-Mercaptopurine  |
| LY-294002                                         | Fludarabine       | Tyrothricin       |
| RH1                                               | Bleomycin         | Vinblastine       |
| XK-469                                            | Paclitaxel        | Cabozantinib      |
| 5-fluoro deoxy uridine 10mer                      | Decitabine        | Axitinib          |
| Seliciclib                                        | Mitomycin         | Etoposide         |
| Entinostat                                        | Bendamustine      | Azacitidine       |
| Alvespimycin                                      | Etoposide         | Floxuridine       |
| 7-Tert-butyl dimethylsilyl-10-hydroxycamptothecin | Homoharringtonine | Trametinib        |
| Karenitecin                                       | Mithramycin       | Palbociclib       |
| PX-316                                            | Tegafur           | Carfilzomib       |
| AFP464                                            | Parthenolide      | Homoharringtonine |
| Rebimastat                                        | Dexrazoxane       | Ixazomib citrate  |
| Imexon                                            | Tamoxifen         | Teniposide        |
| E-7820                                            | Pentostatin       | Ponatinib         |
| LMP-400                                           | Rapamycin         | Bleomycin         |
| LMP776                                            | Carboplatin       | Paclitaxel        |
| Lifiguat                                          | Valrubicin        | Rapamycin         |
| SR16157                                           | Idarubicin        | Teniposide        |

|                                          |                                          |                  |
|------------------------------------------|------------------------------------------|------------------|
| Dimethylaminoparthenolide                | Epirubicin                               | Simvastatin      |
| Selumetinib                              | Oxaliplatin                              | Belinostat       |
| BML-277                                  | Mitoxantrone                             | Doxorubicin      |
| Obatoclax                                | Cytarabine                               | Vincristine      |
| AT-13387                                 | Mitoxantrone                             | Pipamperone      |
| Salinomycin                              | Fludarabine                              | Epirubicin       |
| Itraconazole                             | Imiquimod                                | Idelalisib       |
| XL-147                                   | Carmustine                               | Topotecan        |
| Hydrastinine HCl                         | Mithramycin                              | Arsenic trioxide |
| 1st Precursor Intermediate to TDP 665759 | Rapamycin                                | 6-Mercaptopurine |
| (+)-JQ1                                  | Clofarabine                              | Docetaxel        |
| Fenretinide                              | Vinorelbine                              | Vorinostat       |
| AP-26113                                 | Topotecan                                | Gefitinib        |
| By-Product of CUDC-305                   | Gemcitabine                              | Clofarabine      |
| LOR-253                                  | bisacodyl, active ingredient of viraplex | Dasatinib        |
| Pelitrexol                               | Irinotecan                               | Irinotecan       |
| Cobimetinib (isomer 1)                   | Docetaxel                                | Vinorelbine      |
| Bafetinib                                | Depsipeptide                             | Vandetanib       |
| Methotrexate                             | Simvastatin                              | Cabozantinib     |
| 6-Mercaptopurine                         | Raltitrexed                              | Panobinostat     |
| 6-Mercaptopurine                         | 7-Ethyl-10-hydroxycamptothecin           | Sonidegib        |
| Nitrogen mustard                         | Bortezomib                               | Vemurafenib      |
| Allopurinol                              | Irofulven                                | Ibrutinib        |
| Actinomycin D                            | Temsirolimus                             | Alectinib        |
| Chlorambucil                             | Denileukin Difitox Ontak                 | Dabrafenib       |
| Thiotepa                                 | Pemetrexed                               | Bosutinib        |
| Melphalan                                | Vorinostat                               | ABT-199          |
| Triethylenemelamine                      | Estramustine                             | LDK-378          |
| Dromostanolone Propionate                | Arsenic trioxide                         | LDK-378          |
| Acrichine                                | Eribulin mesilate                        | AZD-9291         |
| Fluorouracil                             | Gefitinib                                |                  |

**Table S3** The primers of ten-prognostic genes

| ID        | sequences               |
|-----------|-------------------------|
| CCL20 F:  | TGCTGTACCAAGAGTTTGCTC   |
| CCL20 R:  | CGCACACAGACAACCTTTTCTTT |
| CD69 F:   | ATTGTCCAGGCCAATACACATT  |
| CD69 R:   | CCTCTCTACCTGCGTATCGTTTT |
| CD70 F:   | GCTTTGGTCCCATTGGTCG     |
| CD70 R:   | CGTCCCACCCAAGTGACTC     |
| DCBLD2 F: | ATGTGGACACACTGTACTAGGC  |
| DCBLD2 R: | CTGTTGGGATAGGTCTGTGGG   |
| MEP1A F:  | GCTTGGACCTCTTTCAAGGGG   |



MEP1A R: GACGGAACATCTCAAAGGCAT  
MMP14 F: CGAGGTGCCCTATGCCTAC  
MMP14 R: CTCGGCAGAGTCAAAGTGG  
PCDH7 F: GGATCGGGTGAGGTGACTTTC  
PCDH7 R: GTTCTCGTCGAAGATCATCTGAC  
PIK3R5 F: CTTCCACGCTACGTGTTGTG  
PIK3R5 R: TGAAGTTTGAAGAACCGTGTGAG  
RNF144B F: CTGGTAGGCTCCACTATCTCG  
RNF144B R: GGGCAAGTGATGGGAGACC  
BTG2 F: ACGGGAAGGGAACCGACAT  
BTG2 R: CAGTGGTGTGTTGTAGTGCTCTG

---

Table S4 Protein antibody stock number

| Protein names | Antibody stock number |
|---------------|-----------------------|
| BTG2          | ab85051               |
| CCRL2         | ab88632               |
| CD69          | ab233396              |
| DCBLD2        | ab115451              |
| MAP1A         | ab184349              |
| MMP14         | ab51074               |
| PCDH7         | ab139274              |
| PIK3R5        | HPA052247             |
| RNF144B       | HPA054127             |
| VIP           | ab8556                |
